# Supplementary material
Source: PubMed Central journal article supplement (PMC1892930)
Supplement: pnas_0606677104_4.pdf [file pnas_0606677104_4.pdf]

**Spreadsheet** contains the T-profiler analyses output carried out on microarray data and MAVisto gene network motifs.

**Table 1.** The description and gene ontology for transcripts whose  $O > 0.66$ .

| ORF     | GENE         | Description                                                                                                                                                                                                                                             | Process                                                                                                                                                  | Component                               | Function                                                                | $\phi$ | O    |
|---------|--------------|---------------------------------------------------------------------------------------------------------------------------------------------------------------------------------------------------------------------------------------------------------|----------------------------------------------------------------------------------------------------------------------------------------------------------|-----------------------------------------|-------------------------------------------------------------------------|--------|------|
| YGR067C |              | Hypothetical protein; has similarity to Adr1p DNA-binding domain                                                                                                                                                                                        |                                                                                                                                                          |                                         |                                                                         | 96°    | 1.17 |
| YER045C | <b>ACA1</b>  | Basic leucine zipper (bZIP) transcription factor of the ATF/CREB family, may regulate transcription of genes involved in utilization of non-optimal carbon sources                                                                                      | transcription initiation from RNA polymerase II promoter                                                                                                 | nucleus                                 | specific RNA polymerase II transcription factor activity                | 257°   | 1.09 |
| YAL054C | <b>ACS1</b>  | Acetyl-coA synthetase isoform, expressed during growth on nonfermentable carbon sources and under aerobic conditions                                                                                                                                    | acetyl-CoA biosynthesis<br>acetate fermentation                                                                                                          | mitochondrion<br>cytosol                | acetate-CoA ligase activity                                             | 159°   | 0.89 |
| YMR303C | <b>ADH2</b>  | Glucose-repressible alcohol dehydrogenase II, catalyzes the conversion of ethanol to acetaldehyde; involved in the production of certain carboxylate esters; regulated by ADR1                                                                          | ethanol metabolism<br>fermentation                                                                                                                       | cytoplasm                               | alcohol dehydrogenase activity                                          | 168°   | 0.82 |
| YPL202C | <b>AFT2</b>  | Iron-regulated transcriptional activator, required for iron homeostasis and resistance to oxidative stress; similar to Aft1p                                                                                                                            | transcription initiation from RNA polymerase II promoter<br>iron ion homeostasis<br>response to oxidative stress<br>positive regulation of transcription | nucleus<br>nucleus<br>mitochondrion     | transcription factor activity<br>specific RNA polymerase II             | 100°   | 0.69 |
| YER073W | <b>ALD5</b>  | Mitochondrial aldehyde dehydrogenase, involved in regulation or biosynthesis of electron transport chain components and acetate formation; activated by K <sup>+</sup> ; utilizes NADP <sup>+</sup> as the preferred coenzyme; constitutively expressed | electron transport<br>acetate biosynthesis                                                                                                               | mitochondrion                           | aldehyde dehydrogenase activity                                         | 87°    | 0.97 |
| YPL061W | <b>ALD6</b>  | Cytosolic aldehyde dehydrogenase that is activated by Mg <sup>2+</sup> and utilizes NADP <sup>+</sup> as the preferred coenzyme; required for the conversion of acetaldehyde to acetate; constitutively expressed                                       | acetate biosynthesis                                                                                                                                     | cytoplasm<br>mitochondrion              | aldehyde dehydrogenase activity                                         | 196°   | 0.68 |
| YMR042W | <b>ARG80</b> | Transcription factor involved in regulation of arginine-responsive genes; acts with Arg81p and Arg82p                                                                                                                                                   | arginine metabolism<br>positive regulation of transcription from RNA polymerase II promoter                                                              | nucleus                                 | DNA binding<br>specific RNA polymerase II transcription factor activity | 92°    | 0.87 |
| YML099C | <b>ARG81</b> | Zinc-finger transcription factor of the Zn(2)-Cys(6) binuclear cluster domain type, involved in the regulation of arginine-responsive genes; acts with Arg80p and Arg82p                                                                                | arginine metabolism<br>negative regulation of calcium ion-dependent exocytosis                                                                           | nucleus                                 | transcription cofactor activity                                         | 88°    |      |
| YDR173C | <b>ARG82</b> | Protein involved in regulation of arginine-responsive and Mcm1p-dependent genes; has a dual-specificity inositol polyphosphate kinase activity required for regulation of phosphate- and nitrogen-responsive genes                                      | arginine metabolism<br>phosphorylation                                                                                                                   | nucleus                                 | inositol or phosphatidylinositol kinase activity                        | 270°   | 0.72 |
| YKR099W | <b>BAS1</b>  | Myb-related transcription factor involved in regulating basal and induced expression of genes of the purine and histidine biosynthesis pathways                                                                                                         | histidine biosynthesis<br>transcription from RNA polymerase II promoter<br>purine base biosynthesis                                                      | nucleus                                 | RNA polymerase II transcription factor activity                         | 91°    | 0.78 |
| YDR423C | <b>CAD1</b>  | AP-1-like bZIP transcriptional activator involved in multiple stress responses, iron metabolism, and pleiotropic drug resistance; controls a set of genes involved in stabilizing proteins, binds consensus sequence TACTAA; 5' UTR contains uORFs      | positive regulation of transcription from RNA polymerase II promoter<br>response to cadmium ion                                                          | nucleus<br>nucleus<br>cytoplasm         | RNA polymerase II transcription factor activity                         | 264°   | 0.75 |
| YMR280C | <b>CAT8</b>  | Zinc cluster transcriptional activator necessary for derepression of a variety of genes under non-fermentative growth conditions, active after diauxic shift, binds carbon source responsive elements                                                   | positive regulation of gluconeogenesis<br>positive regulation of transcription from RNA polymerase II promoter                                           | nucleus                                 | specific RNA polymerase II transcription factor activity                | 257°   | 0.68 |
| YJR060W | <b>CBF1</b>  | Helix-loop-helix protein that binds the motif CACRTG, which is present at several sites including MET gene promoters and centromere DNA element I (CDEI); required for nucleosome positioning at this motif; targets lsw1p to DNA                       | DNA replication and chromosome cycle<br>chromatin assembly or disassembly<br>methionine biosynthesis                                                     | kinetochore<br>nucleus<br>mitochondrion | DNA binding<br>centromeric DNA binding                                  | 85°    |      |
| YOR028C | <b>CIN5</b>  | Basic leucine zipper transcriptional factor of the yAP-1 family that mediates pleiotropic drug resistance and salt tolerance; localizes constitutively to the nucleus                                                                                   | regulation of transcription from RNA polymerase II promoter<br>response to salt stress<br>response to drug                                               | nucleus                                 | DNA binding<br>RNA polymerase II transcription factor activity          | 267°   | 0.98 |
| YDR256C | <b>CTA1</b>  | Catalase A, breaks down hydrogen peroxide in the peroxisomal matrix formed by acyl-CoA oxidase (Pox1p) during fatty acid beta-oxidation                                                                                                                 | oxygen and reactive oxygen species metabolism                                                                                                            | mitochondrion<br>peroxisomal matrix     | catalase activity                                                       | 240°   | 1.05 |
| YGR088W | <b>CTT1</b>  | Cytosolic catalase T, has a role in protection from oxidative damage by hydrogen peroxide                                                                                                                                                               | response to stress                                                                                                                                       | cytoplasm                               | catalase activity                                                       | 261°   | 0.77 |

| ORF     | GENE         | Description                                                                                                                                                                                                                                     | Process                                                                                                                                                                            | Component                                                   | Function                                                                                                              | $\phi$ | O    |
|---------|--------------|-------------------------------------------------------------------------------------------------------------------------------------------------------------------------------------------------------------------------------------------------|------------------------------------------------------------------------------------------------------------------------------------------------------------------------------------|-------------------------------------------------------------|-----------------------------------------------------------------------------------------------------------------------|--------|------|
| YAL012W | <b>CYS3</b>  | Cystathionine gamma-lyase, catalyzes one of the two reactions involved in the transsulfuration pathway that yields cysteine from homocysteine with the intermediary formation of cystathionine;                                                 | sulfur amino acid metabolism<br>cysteine metabolism<br>trans-sulfuration                                                                                                           | cytoplasm                                                   | cystathionine gamma-lyase activity                                                                                    | 63°    | 1.17 |
| YGR155W | <b>CYS4</b>  | Cystathionine beta-synthase, catalyzes the synthesis of cystathionine from serine and homocysteine, the first committed step in cysteine biosynthesis                                                                                           | cysteine biosynthesis                                                                                                                                                              | cytoplasm<br>mitochondrion                                  | cystathionine beta-synthase activity                                                                                  | 68°    | 0.83 |
| YKR034W | <b>DAL80</b> | Negative regulator of genes in multiple nitrogen degradation pathways; expression is regulated by nitrogen levels and by Gln3p; member of the GATA-binding family, forms homodimers and heterodimers with Deh1p                                 | transcription<br>transcription<br>regulation of nitrogen utilization                                                                                                               | nucleus                                                     | transcription factor activity                                                                                         | 152°   | 0.67 |
| YJR137C | <b>ECM17</b> | Sulfite reductase beta subunit, involved in amino acid biosynthesis, transcription repressed by methionine                                                                                                                                      | sulfate assimilation<br>cell wall organization and biogenesis<br>amino acid biosynthesis                                                                                           | cytoplasm<br>cytoplasm<br>sulfite reductase complex (NADPH) | sulfite reductase (NADPH) activity                                                                                    | 99°    | 1.01 |
| YFL021W | <b>GAT1</b>  | Transcriptional activator of genes involved in nitrogen catabolite repression, member of the GATA family of DNA binding proteins; activity and localization regulated by nitrogen limitation and Ure2p                                          | transcription initiation from RNA polymerase II promoter<br>regulation of nitrogen utilization<br>positive regulation of transcription                                             | nucleus                                                     | specific RNA polymerase II transcription factor activity<br>transcriptional activator activity                        | 308°   | 0.80 |
| YMR136W | <b>GAT2</b>  | Protein containing GATA family zinc finger motifs; similar to Gln3p and Dal80p; expression repressed by leucine                                                                                                                                 | transcription                                                                                                                                                                      | nucleus                                                     | transcription factor activity                                                                                         | 245°   | 0.78 |
| YEL009C | <b>GCN4</b>  | Transcriptional activator of amino acid biosynthetic genes in response to amino acid starvation; expression is tightly regulated at both the transcriptional and translational levels                                                           | regulation of transcription from RNA polymerase II promoter<br>amino acid biosynthesis                                                                                             | nucleus                                                     | DNA binding<br>transcriptional activator activity                                                                     | 277°   | 0.33 |
| YER040W | <b>GLN3</b>  | Transcriptional activator of genes regulated by nitrogen catabolite repression (NCR), localization and activity regulated by quality of nitrogen source                                                                                         | nitrogen compound metabolism<br>regulation of nitrogen utilization<br>positive regulation of transcription<br>positive regulation of transcription from RNA polymerase II promoter | nucleus<br>cytosol                                          | transcription factor activity<br>transcriptional activator activity                                                   | 164°   |      |
| YEL046C | <b>GLY1</b>  | Threonine aldolase, catalyzes the cleavage of L-allo-threonine and L-threonine to glycine; involved in glycine biosynthesis                                                                                                                     | glycine biosynthesis<br>threonine catabolism                                                                                                                                       | cytosol                                                     | threonine aldolase activity                                                                                           | 194°   | 0.83 |
| YKL026C | <b>GPX1</b>  | Phospholipid hydroperoxide glutathione peroxidase induced by glucose starvation that protects cells from phospholipid hydroperoxides and nonphospholipid peroxides during oxidative stress                                                      |                                                                                                                                                                                    |                                                             | glutathione peroxidase activity                                                                                       | 262°   | 1.04 |
| YBR244W | <b>GPX2</b>  | Phospholipid hydroperoxide glutathione peroxidase induced by glucose starvation that protects cells from phospholipid hydroperoxides and nonphospholipid peroxides during oxidative stress                                                      | response to oxidative stress                                                                                                                                                       | nucleus<br>cytoplasm                                        | glutathione peroxidase activity                                                                                       | 237°   | 0.68 |
| YCL035C | <b>GRX1</b>  | Hydroperoxide and superoxide-radical responsive heat-stable glutathione-dependent disulfide oxidoreductase with active site cysteine pair; protects cells from oxidative damage                                                                 | response to oxidative stress<br>regulation of cell redox homeostasis                                                                                                               | nucleus<br>cytoplasm                                        | glutathione transferase activity<br>glutathione peroxidase activity<br>thiol-disulfide exchange intermediate activity | 296°   | 0.88 |
| YGL073W | <b>HSF1</b>  | Trimeric heat shock transcription factor, activates multiple genes in response to hyperthermia; recognizes variable heat shock elements (HSEs) consisting of inverted NGAAN repeats; constitutively DNA-bound; post-translationally regulated   | regulation of transcription from RNA polymerase II promoter<br>response to stress<br>response to heat<br>spindle pole body duplication                                             | nucleus<br>mitochondrion                                    | transcription factor activity                                                                                         | 259°   |      |
| YDR123C | <b>INO2</b>  | Component of the heteromeric Ino2p/Ino4p basic helix-loop-helix transcription activator that binds inositol/choline-responsive elements (ICREs), required for derepression of phospholipid biosynthetic genes in response to inositol depletion | phospholipid biosynthesis<br>positive regulation of transcription from RNA polymerase II promoter<br>positive regulation of transcription from RNA polymerase II promoter          | nucleus                                                     | specific RNA polymerase II transcription factor activity                                                              | 82°    | 0.78 |
| YOL108C | <b>INO4</b>  | Transcription factor required for derepression of inositol-choline-regulated genes involved in phospholipid synthesis; forms a complex, with Ino2p, that binds the inositol-choline-responsive element through a basic helix-loop-helix domain  | phospholipid biosynthesis<br>positive regulation of transcription from RNA polymerase II promoter                                                                                  | nucleus                                                     | DNA binding<br>specific RNA polymerase II transcription factor activity                                               | 264°   |      |
| YNL182C | <b>IP13</b>  | Protein required for cell viability; computational analysis of large-scale protein-protein interaction data suggests a possible role in assembly of the ribosomal large subunit                                                                 | ribosomal large subunit assembly and maintenance<br>ribosomal large subunit assembly and maintenance<br>35S primary transcript processing                                          | nucleus<br>nucleoplasm                                      |                                                                                                                       | 26°    | 0.94 |

| ORF     | GENE         | Description                                                                                                                                                                                                                                    | Process                                                                                                                                                    | Component                                                            | Function                                                                                                      | $\phi$ | O    |
|---------|--------------|------------------------------------------------------------------------------------------------------------------------------------------------------------------------------------------------------------------------------------------------|------------------------------------------------------------------------------------------------------------------------------------------------------------|----------------------------------------------------------------------|---------------------------------------------------------------------------------------------------------------|--------|------|
| YMR043W | <b>MCM1</b>  | Transcription factor involved in cell-type-specific transcription and pheromone response; plays a central role in the formation of both repressor and activator complexes                                                                      | DNA replication initiation<br>regulation of transcription from RNA polymerase II promoter                                                                  | nuclear chromatin<br>nucleus                                         | DNA binding<br>DNA replication origin binding<br>RNA polymerase II transcription factor activity              | 274°   |      |
| YFR030W | <b>MET10</b> | Subunit alpha of assimilatory sulfite reductase, which is responsible for the conversion of sulfite into sulfide                                                                                                                               | sulfate assimilation                                                                                                                                       | cytoplasm<br>sulfite reductase complex (NADPH)                       | sulfite reductase (NADPH) activity                                                                            | 83°    | 1.11 |
| YKL001C | <b>MET14</b> | Adenylylsulfate kinase, required for sulfate assimilation and involved in methionine metabolism                                                                                                                                                | sulfate assimilation<br>methionine metabolism                                                                                                              | intracellular<br>cytoplasm                                           | adenylyl-sulfate kinase activity                                                                              | 60°    | 1.30 |
| YPR167C | <b>MET16</b> | 3'-phosphoadenylylsulfate reductase, reduces 3'-phosphoadenylyl sulfate to adenosine-3',5'-bisphosphate and free sulfite using reduced thioredoxin as cosubstrate, involved in sulfate assimilation and methionine metabolism                  | sulfate assimilation<br>methionine metabolism                                                                                                              | intracellular<br>cytoplasm                                           | phosphoadenylyl-sulfate reductase (thioredoxin) activity                                                      | 53°    | 1.34 |
| YLR303W | <b>MET17</b> | O-acetyl homoserine-O-acetyl serine sulfhydrylase, required for sulfur amino acid synthesis                                                                                                                                                    | methionine metabolism<br>cysteine biosynthesis                                                                                                             | cytoplasm                                                            | O-acetylhomoserine aminocarboxypropyltransferase activity<br>cysteine synthase activity                       | 108°   | 0.82 |
| YLR303W | <b>MET17</b> | O-acetyl homoserine-O-acetyl serine sulfhydrylase, required for sulfur amino acid synthesis                                                                                                                                                    | methionine metabolism<br>cysteine biosynthesis                                                                                                             | cytoplasm                                                            | O-acetylhomoserine aminocarboxypropyltransferase activity<br>cysteine synthase activity                       | 108°   | 0.82 |
| YNL277W | <b>MET2</b>  | L-homoserine-O-acetyltransferase, catalyzes the conversion of homoserine to O-acetyl homoserine which is the first step of the methionine biosynthetic pathway                                                                                 | methionine biosynthesis<br>homoserine metabolism                                                                                                           | cytoplasm                                                            | homoserine O-acetyltransferase activity                                                                       | 43°    | 1.22 |
| YIR017C | <b>MET28</b> | Transcriptional activator in the Cbf1p-Met4p-Met28p complex, participates in the regulation of sulfur metabolism                                                                                                                               | sulfur amino acid biosynthesis<br>regulation of transcription from RNA polymerase II promoter<br>regulation of sulfur metabolism                           | nucleus                                                              | DNA binding<br>specific RNA polymerase II transcription factor activity<br>transcriptional activator activity | 45°    | 1.25 |
| YJR010W | <b>MET3</b>  | ATP sulfurylase, catalyzes the primary step of intracellular sulfate activation, essential for assimilatory reduction of sulfate to sulfide, involved in methionine metabolism                                                                 | sulfate assimilation<br>methionine metabolism                                                                                                              | cytoplasm<br>mitochondrion                                           | sulfate adenylyltransferase (ATP) activity                                                                    | 77°    | 1.22 |
| YIL046W | <b>MET30</b> | F-box protein containing five copies of the WD40 motif, controls cell cycle function, sulfur metabolism, and methionine biosynthesis as part of the ubiquitin ligase complex; interacts with and regulates Met4p, localizes within the nucleus | cell cycle<br>protein ubiquitination<br>SCF-dependent proteasomal ubiquitin-dependent protein catabolism<br>response to arsenic<br>response to cadmium ion | SCF ubiquitin ligase complex<br>nuclear SCF ubiquitin ligase complex | protein binding                                                                                               | 36°    | 0.92 |
| YPL038W | <b>MET31</b> | Zinc-finger DNA-binding protein, involved in regulating expression of the methionine biosynthetic genes, similar to Met32p                                                                                                                     | sulfur amino acid metabolism<br>regulation of transcription                                                                                                | nucleus<br>nucleus<br>cytoplasm                                      | DNA binding<br>specific RNA polymerase II transcription factor activity                                       | 331°   |      |
| YDR253C | <b>MET32</b> | Zinc-finger DNA-binding protein, involved in regulating expression of the methionine biosynthetic genes, similar to Met31p                                                                                                                     | sulfur amino acid metabolism                                                                                                                               | nucleus                                                              | DNA binding<br>specific RNA polymerase II transcription factor activity                                       | 41°    | 1.39 |
| YNL103W | <b>MET4</b>  | Lecine-zipper transcriptional activator, responsible for the regulation of the sulfur amino acid pathway, requires different combinations of the auxiliary factors Cbf1p, Met28p, Met31p and Met32p                                            | sulfur amino acid metabolism<br>positive regulation of transcription from RNA polymerase II promoter<br>response to arsenic<br>response to cadmium ion     | nucleus                                                              | transcription co activator activity                                                                           | 39°    | 1.13 |
| YGR249W | <b>MGA1</b>  | Protein similar to heat shock transcription factor; multicopy suppressor of pseudohyphal growth defects of ammonium permease mutants                                                                                                           | filamentous growth                                                                                                                                         |                                                                      |                                                                                                               | 212°   | 0.82 |
| YOL116W | <b>MSN1</b>  | Transcriptional activator involved in regulation of invertase and glucoamylase expression, invasive growth and pseudohyphal differentiation, iron uptake, chromium accumulation, and response to osmotic stress; localizes to the nucleus      | invasive growth ( <i>sensu Saccharomyces</i> )<br>hyperosmotic response                                                                                    | nucleus                                                              | transcriptional activator activity                                                                            | 267°   | 0.68 |

| ORF     | GENE        | Description                                                                                                                                                                                                                                     | Process                                                                                                                                                                                                                                    | Component                               | Function                                                                                                                                                                          | $\phi$ | O    |
|---------|-------------|-------------------------------------------------------------------------------------------------------------------------------------------------------------------------------------------------------------------------------------------------|--------------------------------------------------------------------------------------------------------------------------------------------------------------------------------------------------------------------------------------------|-----------------------------------------|-----------------------------------------------------------------------------------------------------------------------------------------------------------------------------------|--------|------|
| YMR037C | <b>MSN2</b> | Transcriptional activator related to Msn4p; activated in stress conditions, which results in translocation from the cytoplasm to the nucleus; binds DNA at stress response elements of responsive genes, inducing gene expression               | replicative cell aging<br>age-dependent response to oxidative stress during chronological cell aging<br>regulation of transcription, DNA-dependent<br>response to stress                                                                   | nucleus<br>cytosol                      | DNA binding<br>transcription factor activity                                                                                                                                      | 274°   | 0.39 |
| YKL062W | <b>MSN4</b> | Transcriptional activator related to Msn2p; activated in stress conditions, which results in translocation from the cytoplasm to the nucleus; binds DNA at stress response elements of responsive genes, inducing gene expression               | replicative cell aging<br>age-dependent response to oxidative stress during chronological cell aging<br>regulation of transcription, DNA-dependent<br>response to stress                                                                   | nucleus<br>cytoplasm                    | DNA binding<br>transcription factor activity                                                                                                                                      | 245°   | 0.79 |
| YKL043W | <b>PHD1</b> | Transcriptional activator that enhances pseudohyphal growth; regulates expression of FLO11, an adhesin required for pseudohyphal filament formation; similar to StuA, an A. nidulans developmental regulator; potential Cdc28p substrate        | pseudohyphal growth                                                                                                                                                                                                                        | nucleus                                 | specific RNA polymerase II<br>transcription factor activity                                                                                                                       | 254°   | 0.86 |
| YBL064C | <b>PRX1</b> | Mitochondrial peroxiredoxin (1-Cys Prx) with thioredoxin peroxidase activity, has a role in reduction of hydroperoxides; induced during respiratory growth and under conditions of oxidative stress                                             | regulation of cell redox homeostasis                                                                                                                                                                                                       | mitochondrion                           | thioredoxin peroxidase activity                                                                                                                                                   | 299°   | 0.82 |
| YOR207C | <b>RET1</b> | Second-largest subunit of RNA polymerase III, which is responsible for the transcription of tRNA and 5S RNA genes, and other low molecular weight RNAs                                                                                          | transcription from RNA polymerase III promoter                                                                                                                                                                                             | DNA-directed RNA polymerase III complex | DNA-directed RNA polymerase activity                                                                                                                                              | 63°    | 0.77 |
| YKL038W | <b>RGT1</b> | Glucose-responsive transcription factor that regulates expression of several glucose transporter (HXT) genes in response to glucose; binds to promoters and acts both as a transcriptional activator and repressor                              | glucose metabolism<br>negative regulation of transcription<br>regulation of glucose import<br>inferred from expression pattern                                                                                                             | nucleus                                 | DNA binding<br>RNA polymerase II transcription factor activity<br>transcription co-repressor activity<br>transcriptional activator activity<br>transcriptional repressor activity | 252°   | 0.76 |
| YPR065W | <b>ROX1</b> | Heme-dependent repressor of hypoxic genes; contains an HMG domain that is responsible for DNA bending activity                                                                                                                                  | negative regulation of transcription from RNA polymerase II promoter                                                                                                                                                                       | nuclear chromosome                      | DNA bending activity<br>specific transcriptional repressor activity                                                                                                               | 227°   | 0.75 |
| YIL119C | <b>RPI1</b> | Putative transcriptional regulator; over-expression suppresses the heat shock sensitivity of wild-type RAS2 over-expression and also suppresses the cell lysis defect of an mpk1 mutation                                                       | RAS protein signal transduction<br>thiamine biosynthesis                                                                                                                                                                                   | nucleus                                 | small GTPase regulator activity                                                                                                                                                   | 244°   | 0.97 |
| YJL089W | <b>SIP4</b> | C6 zinc cluster transcriptional activator that binds to the carbon source-responsive element (CSRE) of gluconeogenic genes; involved in the positive regulation of gluconeogenesis; regulated by Snf1p protein kinase; localized to the nucleus | regulation of transcription from RNA polymerase II promoter<br>positive regulation of gluconeogenesis                                                                                                                                      | nucleus                                 | specific RNA polymerase II<br>transcription factor activity                                                                                                                       | 130°   | 0.98 |
| YHR206W | <b>SKN7</b> | Nuclear response regulator and transcription factor, part of a branched two-component signaling system; required for optimal induction of heat-shock genes in response to oxidative stress; involved in osmoregulation                          | transcription<br>response to osmotic stress<br>response to oxidative stress                                                                                                                                                                | nucleus                                 | two-component response regulator activity<br>transcription factor activity                                                                                                        | 227°   |      |
| YHR008C | <b>SOD2</b> | Manganese-containing superoxide dismutase                                                                                                                                                                                                       | replicative cell aging<br>age-dependent response to reactive oxygen species during chronological cell aging<br>age-dependent response to oxidative stress during chronological cell aging<br>oxygen and reactive oxygen species metabolism | mitochondrion<br>mitochondrial matrix   | manganese superoxide dismutase activity                                                                                                                                           | 263°   | 1.04 |
| YMR016C | <b>SOK2</b> | Nuclear protein that plays a regulatory role in the cyclic AMP (cAMP)-dependent protein kinase (PKA) signal transduction pathway; negatively regulates pseudohyphal differentiation; homologous to several transcription factors                | pseudohyphal growth                                                                                                                                                                                                                        | nucleus                                 | transcription factor activity                                                                                                                                                     | 252°   | 0.79 |

| ORF     | GENE        | Description                                                                                                                                                                                                                                     | Process                                                                                                                                                                                             | Component                             | Function                                                                                     | $\phi$ | O    |
|---------|-------------|-------------------------------------------------------------------------------------------------------------------------------------------------------------------------------------------------------------------------------------------------|-----------------------------------------------------------------------------------------------------------------------------------------------------------------------------------------------------|---------------------------------------|----------------------------------------------------------------------------------------------|--------|------|
| YDL048C | <b>STP4</b> | Protein involved in pre-tRNA splicing and in uptake of branched-chain amino acids                                                                                                                                                               |                                                                                                                                                                                                     | nucleus<br>cytoplasm<br>mitochondrion |                                                                                              | 241°   | 0.95 |
| YBR294W | <b>SUL1</b> | High affinity sulfate permease; sulfate uptake is mediated by specific sulfate transporters Sul1p and Sul2p, which control the concentration of endogenous activated sulfate intermediates                                                      | sulfate transport                                                                                                                                                                                   | plasma membrane                       | sulfate transporter activity                                                                 | 94°    | 1.05 |
| YLR092W | <b>SUL2</b> | High affinity sulfate permease; sulfate uptake is mediated by specific sulfate transporters Sul1p and Sul2p, which control the concentration of endogenous activated sulfate intermediates                                                      | sulfate transport                                                                                                                                                                                   | plasma membrane                       | sulfate transporter activity                                                                 | 61°    | 1.24 |
| YGL162W | <b>SUT1</b> | Transcription factor of the Zn[II]2Cys6 family involved in sterol uptake; involved in induction of hypoxic gene expression                                                                                                                      | regulation of transcription from RNA polymerase II promoter<br>sterol transport<br>regulation of transcription                                                                                      | nucleus                               | transcription factor activity<br>specific RNA polymerase II                                  | 84°    | 0.85 |
| YGL096W | <b>TOS8</b> | Homeodomain-containing transcription factor; SBF regulated target gene that in turn regulates expression of genes involved in G1/S phase events such as bud site selection, bud emergence and cell cycle progression; similarity to Cup9p       | G1/S-specific transcription in mitotic cell cycle                                                                                                                                                   | nucleus                               | transcription factor activity                                                                | 243°   | 0.91 |
| YDR513W | <b>TTR1</b> | Cytoplasmic glutaredoxin, thioltransferase, glutathione-dependent disulfide oxidoreductase involved in maintaining redox state of target proteins, also exhibits glutathione peroxidase activity, expression induced in response to stress      | response to oxidative stress<br>regulation of cell redox<br>homeostasis                                                                                                                             | mitochondrion<br>cytosol              | glutathione transferase activity<br>thiol-disulfide exchange intermediate activity           | 260°   | 0.97 |
| YDL170W | <b>UGA3</b> | Transcriptional activator necessary for gamma-aminobutyrate (GABA)-dependent induction of GABA genes (such as UGA1, UGA2, UGA4); zinc-finger transcription factor of the Zn(2)-Cys(6) binuclear cluster domain type; localized to the nucleus   | regulation of transcription from RNA polymerase II promoter<br>nitrogen utilization<br>positive regulation of transcription, DNA-dependent                                                          | nucleus                               | transcription factor activity<br>specific RNA polymerase II<br>transcription factor activity | 123°   | 0.72 |
| YDR207C | <b>UME6</b> | Key transcriptional regulator of early meiotic genes, binds URS1 upstream regulatory sequence, couples metabolic responses to nutritional cues with initiation and progression of meiosis, forms complex with Ime1p, and also with Sin3p-Rpd3p  | chromosome organization and biogenesis (sensu Eukaryota)<br>negative regulation of transcription, mitotic<br>meiotic recombination<br>sporulation (sensu Fungi)<br>positive regulation of meiosis   | nucleus                               | DNA binding<br>transcription regulator activity                                              | 235°   |      |
| YML076C | <b>WAR1</b> | Homodimeric Zn2Cys6 zinc finger transcription factor; binds to a weak acid response element to induce transcription of PDR12 and FUN34, encoding an acid transporter and a putative ammonia transporter, respectively                           | response to acid                                                                                                                                                                                    | nucleus<br>mitochondrion              | transcription factor activity                                                                | 104°   | 0.73 |
| YOR230W | <b>WTM1</b> | Transcriptional repressor involved in regulation of meiosis and silencing; contains WD repeats                                                                                                                                                  | regulation of meiosis                                                                                                                                                                               | nucleus                               | transcription corepressor activity                                                           | 279°   | 0.86 |
| YIL101C | <b>XBP1</b> | Transcriptional repressor that binds to promoter sequences of the cyclin genes, CYS3, and SMF2; expression is induced by stress or starvation during mitosis, and late in meiosis; member of the Swi4p/Mbp1p family; potential Cdc28p substrate | response to stress                                                                                                                                                                                  | nucleus                               | transcription factor activity                                                                | 247°   | 0.87 |
| YML007W | <b>YAP1</b> | Basic leucine zipper (bZIP) transcription factor required for oxidative stress tolerance; mediates pleiotropic drug and metal resistance; localized to the nucleus in response to the presence of oxidants                                      | transcription<br>response to oxidative stress<br>response to drug<br>response to arsenic                                                                                                            | nucleus<br>cytoplasm                  | transcription factor activity                                                                | 271°   | 0.92 |
| YDR451C | <b>YHP1</b> | One of two homeobox transcriptional repressors (see also Yox1p), that bind to Mcm1p and to early cell cycle box (ECB) elements of cell cycle regulated genes, thereby restricting ECB-mediated transcription to the M/G <sub>1</sub> interval   | G <sub>1</sub> /S-specific transcription in mitotic cell cycle<br>negative regulation of transcription from RNA polymerase II promoter<br>regulation of mitotic cell cycle<br>regulation of meiosis | nuclear<br>chromosome                 | DNA binding<br>specific transcriptional repressor activity                                   | 235°   | 0.84 |
| YOR162C | <b>YRR1</b> | Zn2-Cys6 zinc-finger transcription factor that activates genes involved in multidrug resistance; paralog of Yrm1p, acting on an overlapping set of target genes                                                                                 | multidrug transport<br>positive regulation of transcription from RNA polymerase II promoter                                                                                                         | nucleus                               | specific RNA polymerase II<br>transcription factor activity                                  | 260°   | 0.79 |
| YJR127C | <b>ZMS1</b> | Zinc-finger protein that localizes to the nucleus, putative transcriptional regulator of ALD6                                                                                                                                                   |                                                                                                                                                                                                     | nucleus                               | transcription factor activity                                                                | 261°   | 0.69 |
