# Supplementary material
Source: PubMed Central journal article supplement (PMC1892930)

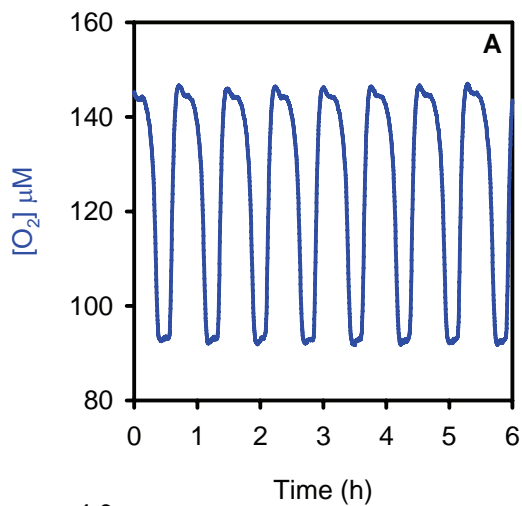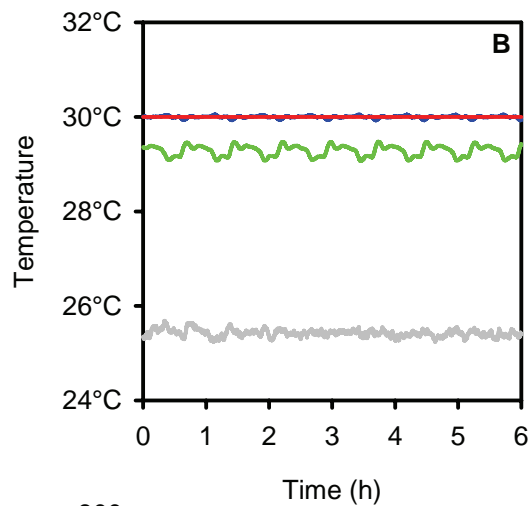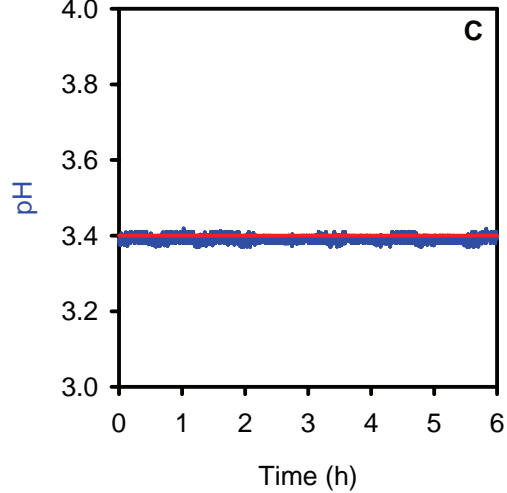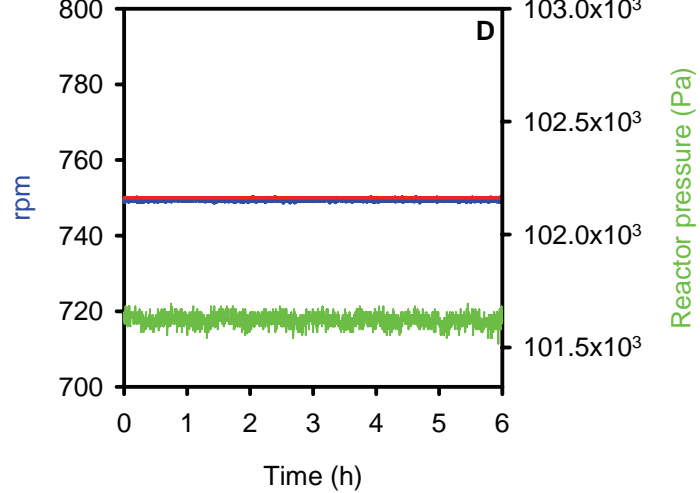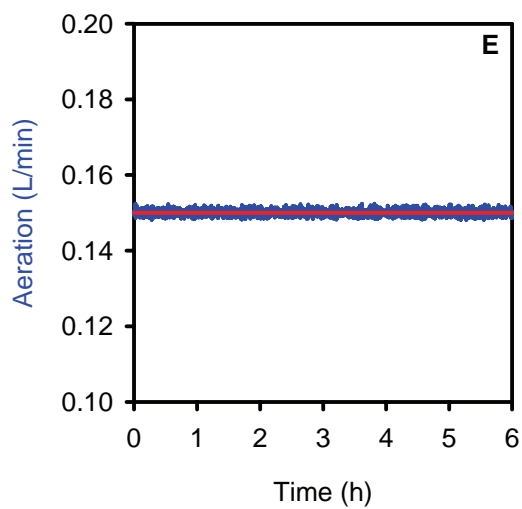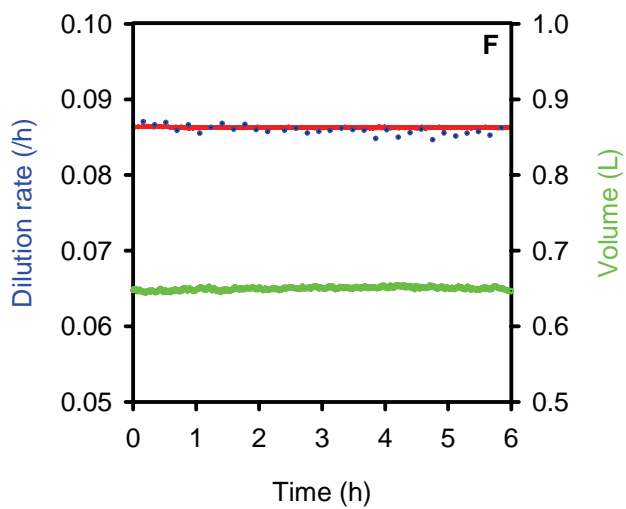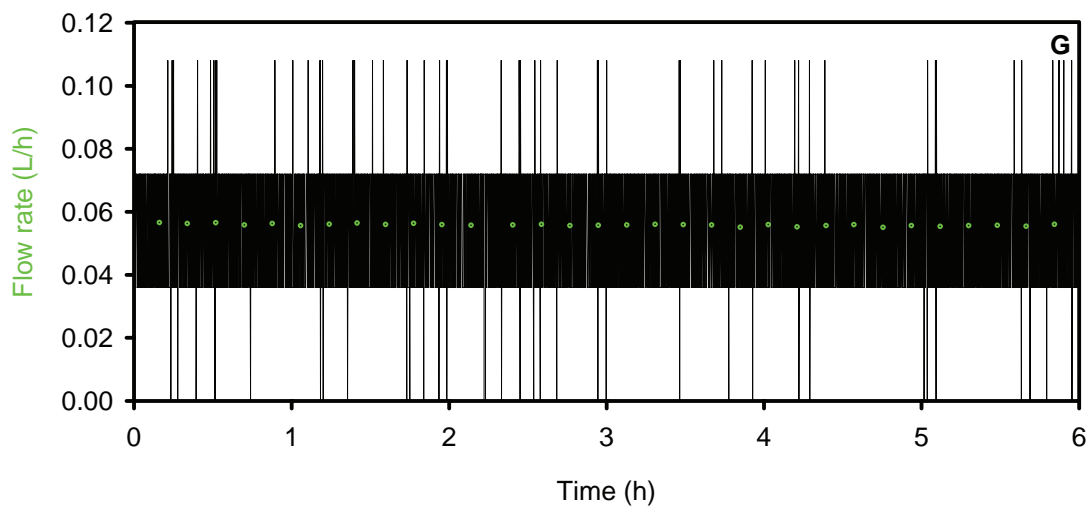

Supplement: pnas_0606677104_1.pdf [file pnas_0606677104_1.pdf]

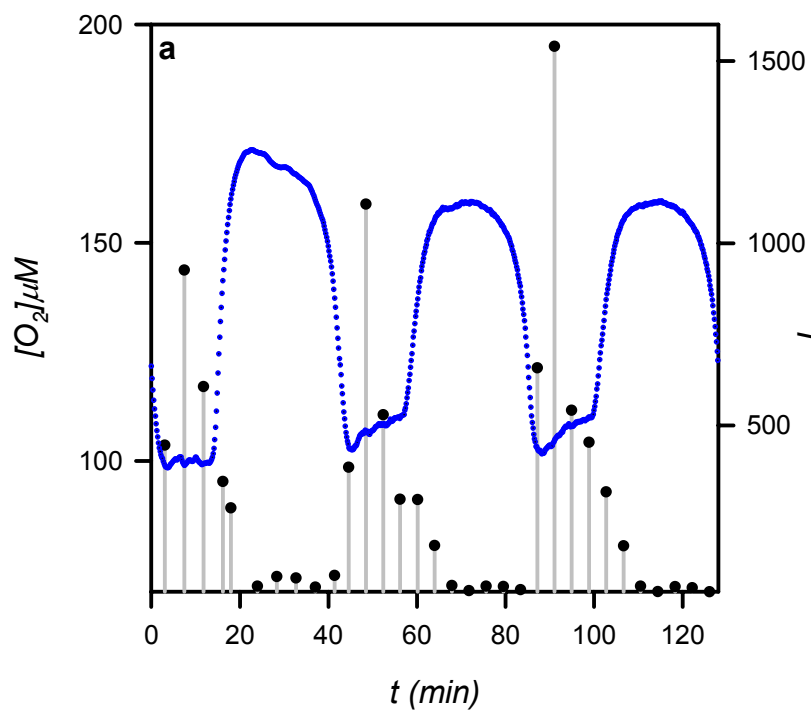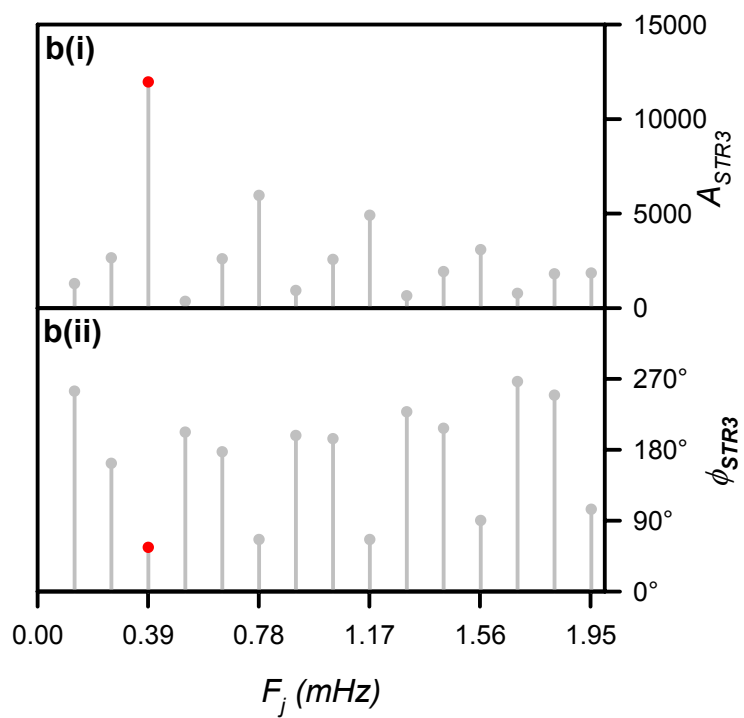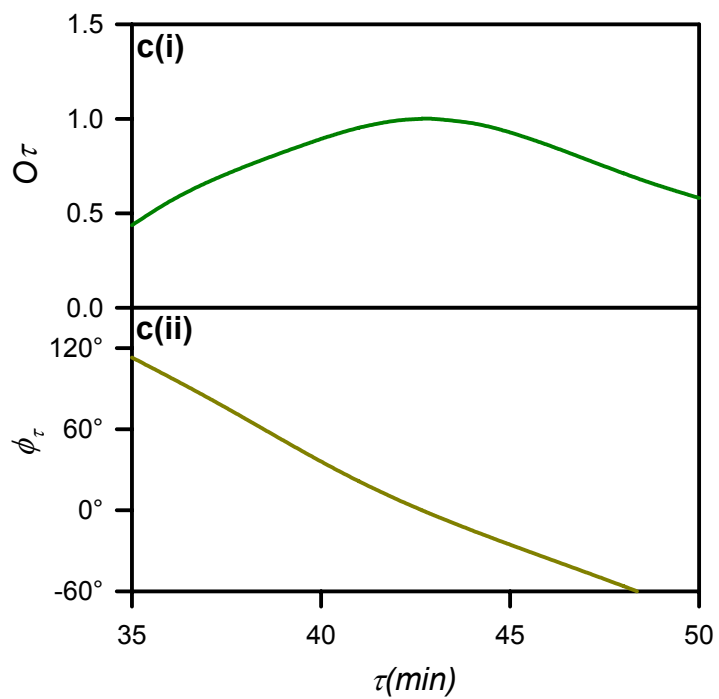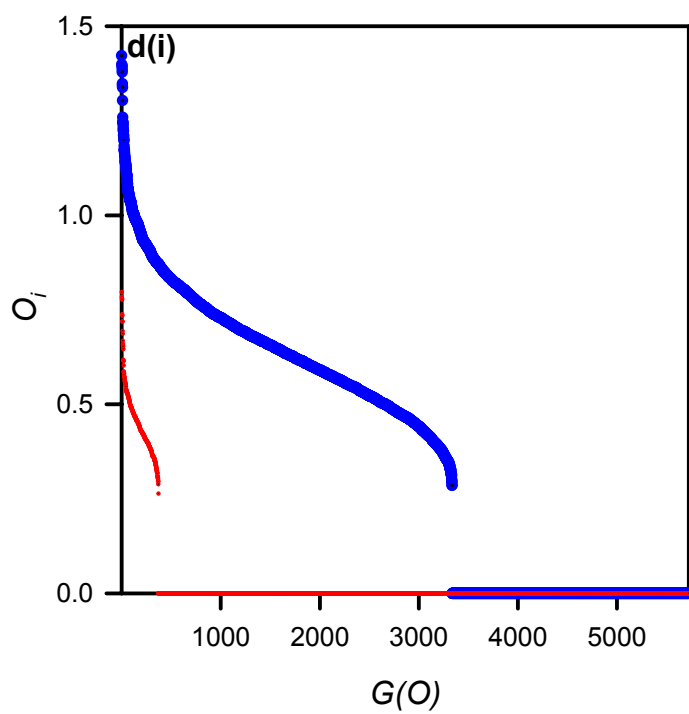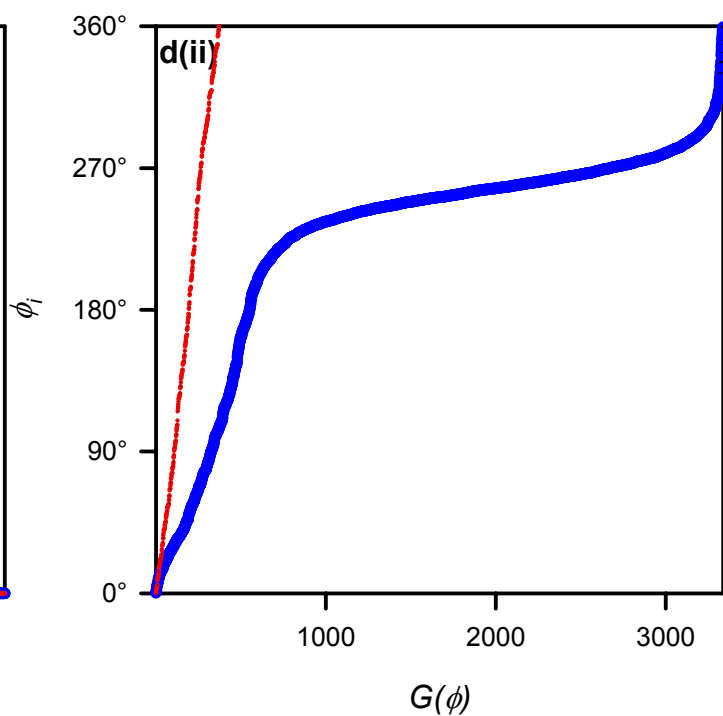

Supplement: pnas_0606677104_2.pdf [file pnas_0606677104_2.pdf]

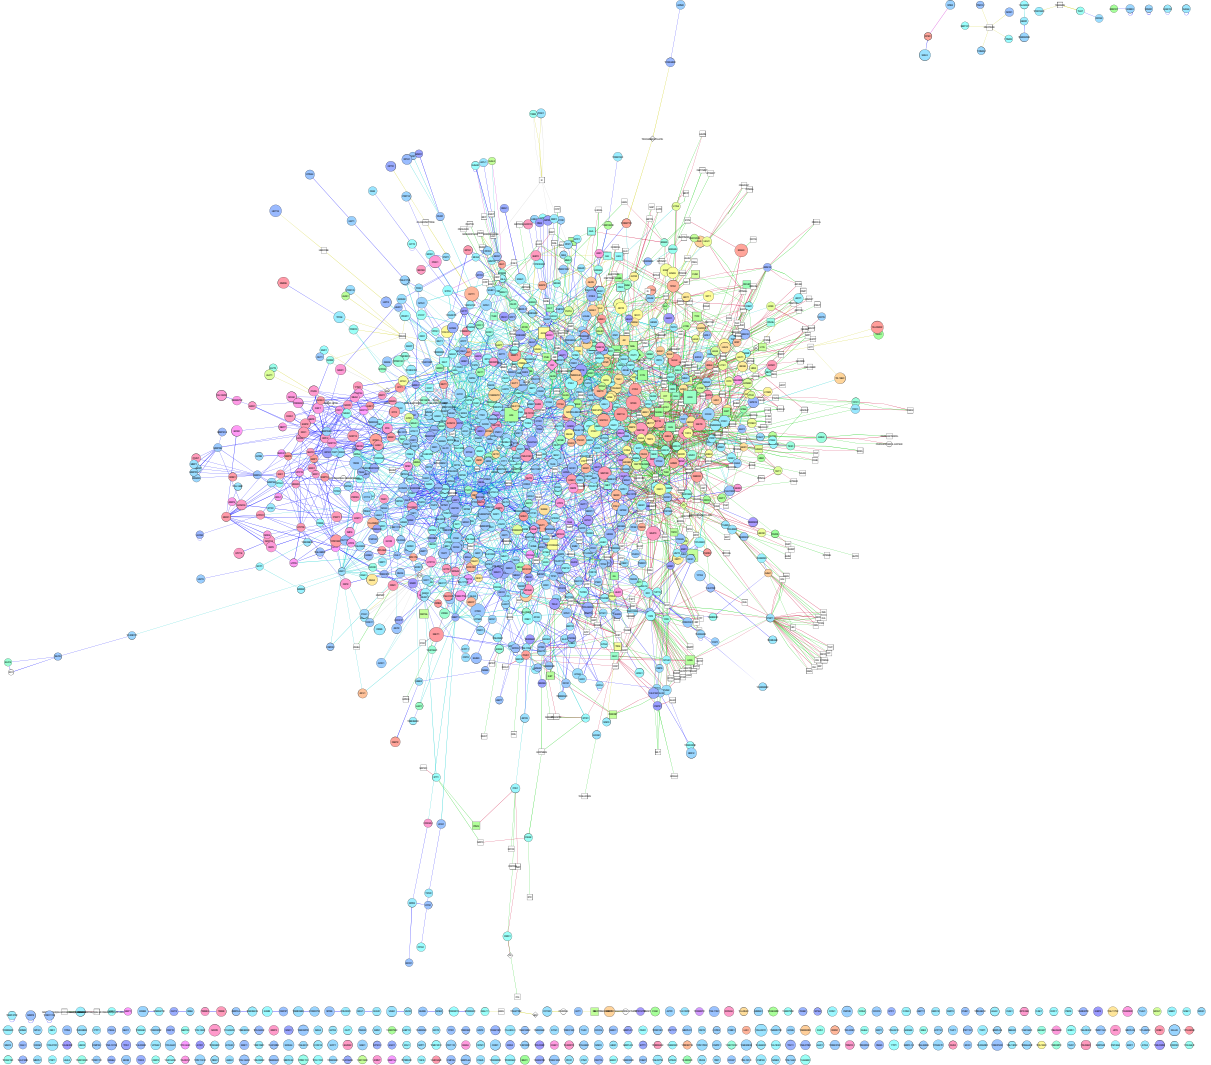

Supplement: pnas_0606677104_3.pdf [file pnas_0606677104_3.pdf]
